# Supplementary material for: Minimally invasive concretion-expulsion technique for primary canaliculitis: a prospective interventional study
Source: BMC Ophthalmol. 2025 Nov 5;25:623. doi: 10.1186/s12886-025-04457-2 (PMC12587586; doi:10.1186/s12886-025-04457-2)
Supplement: Supplementary file 1 — Supplementary Material 1 [file 12886_2025_4457_MOESM1_ESM.xlsx]

## Sheet: Sheet1
ID	sex	age	disease_duration	dry_eye	concretion_expulsions	eye	canaliculus involved	Discharge	redness	epiphora	swelling	foreign body sensation	pain	mucopurulent discharge	medial canthal swelling	pouting punctum	conjunctival hyperemia	canalicular dilation	canalicular obstruction	concretions
1	male	61	13	yes	1	left	lower	yes	yes	yes	no	no	no	yes	yes	no	yes	no	yes	yes
2	male	58	10	yes	1	left	upper	yes	yes	no	yes	no	no	yes	yes	yes	yes	yes	yes	yes
3	male	63	11	yes	1	right	lower	yes	yes	yes	no	no	no	yes	no	no	no	no	no	yes
4	male	60	13	yes	1	left	lower	yes	yes	yes	yes	no	no	no	no	no	yes	no	no	yes
5	male	61	10	yes	1	left	upper	yes	yes	yes	no	no	no	yes	no	no	yes	yes	no	yes
6	male	58	13	yes	1	right	multiple	yes	yes	yes	yes	no	no	no	no	no	yes	yes	no	yes
7	male	63	14	yes	1	left	upper	yes	yes	no	yes	no	no	no	no	yes	yes	yes	no	no
8	male	59	11	yes	1	right	upper	yes	yes	yes	yes	yes	no	yes	no	yes	no	yes	no	no
9	male	60	12	yes	1	left	lower	yes	yes	yes	no	no	no	yes	no	yes	no	yes	no	no
10	male	59	14	yes	1	left	lower	yes	yes	yes	yes	no	no	yes	no	yes	no	yes	no	no
11	male	62	12	yes	1	left	lower	yes	yes	no	yes	no	no	no	no	yes	no	yes	no	yes
12	male	63	11	yes	1	right	upper	yes	yes	yes	no	yes	no	yes	no	yes	no	yes	yes	yes
13	male	59	12	yes	1	left	lower	yes	yes	yes	yes	no	no	no	no	yes	no	yes	yes	yes
14	female	55	15	yes	1	right	lower	yes	yes	yes	no	no	no	yes	no	yes	no	yes	yes	yes
15	female	57	13	yes	1	left	multiple	yes	yes	no	yes	yes	no	no	no	yes	no	yes	yes	yes
16	female	58	11	yes	1	left	lower	yes	yes	no	yes	no	no	yes	no	yes	no	yes	yes	yes
17	female	58	12	yes	1	left	upper	yes	yes	yes	yes	no	yes	yes	no	yes	no	yes	no	yes
18	female	60	11	yes	1	right	upper	yes	yes	yes	yes	yes	no	yes	no	yes	no	yes	yes	yes
19	female	61	14	yes	1	right	lower	yes	yes	yes	yes	no	no	no	yes	yes	no	yes	no	yes
20	female	61	10	yes	1	left	lower	yes	yes	no	yes	yes	no	yes	no	yes	no	yes	no	yes
21	female	63	13	yes	1	right	upper	yes	yes	yes	yes	no	yes	yes	yes	yes	no	yes	no	yes
22	female	64	10	yes	1	left	lower	yes	yes	no	yes	no	no	no	no	yes	no	no	no	yes
23	female	64	14	yes	1	left	upper	yes	yes	yes	no	no	no	no	yes	yes	no	no	no	yes
24	female	65	12	yes	1	left	lower	yes	yes	no	yes	yes	yes	no	yes	yes	no	no	no	yes
25	female	66	14	yes	1	left	upper	yes	yes	yes	yes	yes	yes	no	no	yes	no	no	no	yes
26	female	68	11	yes	1	left	lower	yes	yes	yes	yes	no	no	no	yes	yes	no	no	no	yes
27	female	69	12	yes	1	right	upper	yes	yes	no	yes	no	no	no	no	yes	no	no	no	yes
28	female	69	11	yes	1	left	lower	yes	yes	yes	yes	yes	no	no	no	yes	no	no	no	yes
29	female	56	14	yes	1	right	upper	yes	yes	yes	yes	no	no	no	yes	yes	no	yes	yes	yes
30	female	56	10	yes	1	left	lower	yes	yes	yes	yes	no	no	no	yes	yes	no	no	no	yes
31	female	58	15	no	1	right	upper	yes	yes	no	no	no	yes	no	no	yes	no	no	no	yes
32	female	59	13	no	1	left	upper	yes	yes	yes	no	no	no	no	yes	yes	no	no	no	yes
33	female	61	12	no	1	right	lower	yes	yes	yes	yes	no	no	no	no	yes	no	no	no	yes
34	female	62	13	no	1	left	lower	yes	yes	yes	yes	no	no	no	yes	yes	no	no	no	yes
35	female	63	10	no	1	right	upper	yes	yes	yes	yes	no	no	no	yes	no	no	no	no	yes
36	female	76	25	no	1	left	lower	yes	yes	no	yes	no	no	no	no	no	no	no	no	yes
37	female	78	22	no	1	right	upper	yes	yes	yes	yes	no	no	no	no	no	no	no	no	yes
38	female	76	25	no	1	left	lower	yes	yes	yes	no	no	no	no	yes	no	no	no	no	no
39	female	75	24	no	1	right	upper	yes	yes	yes	yes	no	no	no	no	no	no	no	no	yes
40	female	77	25	no	1	left	upper	yes	yes	yes	no	no	no	no	no	no	no	no	no	yes
41	female	77	23	no	1	right	lower	yes	yes	no	yes	no	no	no	yes	no	no	no	no	yes
42	female	75	25	no	1	left	upper	yes	no	yes	yes	no	no	no	yes	no	no	no	no	yes
43	female	78	23	no	1	right	lower	yes	yes	yes	no	no	no	no	no	no	no	no	no	yes
44	female	77	24	no	1	left	lower	yes	yes	yes	no	no	no	no	yes	no	no	no	no	yes
45	female	78	23	no	1	right	upper	yes	yes	no	yes	no	yes	no	yes	yes	no	yes	yes	yes
46	female	76	26	no	1	right	lower	yes	yes	yes	no	no	no	no	yes	no	no	no	no	yes
47	female	76	24	no	1	left	lower	yes	yes	yes	yes	no	no	no	no	no	no	no	no	yes
48	female	75	25	no	1	right	lower	yes	yes	yes	yes	no	no	no	no	no	no	no	no	yes
49	female	77	22	no	1	left	lower	yes	no	yes	no	no	no	no	no	no	no	no	no	yes
50	female	75	25	no	1	left	upper	yes	yes	yes	yes	no	no	no	yes	no	no	no	no	yes
51	female	77	23	no	1	right	lower	yes	yes	yes	no	no	no	no	no	no	no	no	no	yes
52	female	78	25	no	1	right	upper	yes	yes	yes	yes	yes	no	no	no	no	no	no	no	yes
53	female	78	23	no	1	left	lower	yes	yes	no	no	no	no	no	yes	no	no	no	no	yes
54	female	76	25	no	1	right	multiple	yes	yes	yes	yes	no	no	no	yes	no	no	no	no	yes
55	female	76	24	no	1	left	lower	yes	no	yes	yes	no	no	yes	no	no	no	no	no	yes
56	female	75	24	no	1	right	upper	yes	yes	yes	no	no	no	yes	yes	no	no	no	no	yes
57	female	77	23	no	1	left	lower	yes	yes	yes	no	no	no	yes	yes	no	no	no	no	yes
yes	female	75	26	no	1	right	lower	yes	yes	no	no	no	no	no	no	no	no	no	no	yes
59	female	77	23	no	1	left	lower	yes	yes	yes	yes	no	no	yes	no	no	no	no	no	yes
60	female	78	24	no	1	right	lower	yes	yes	yes	yes	no	no	yes	yes	no	no	no	no	yes
61	male	62	12	yes	2	right	upper	yes	yes	yes	no	no	no	yes	no	no	no	no	no	yes
62	male	59	10	yes	2	left	lower	yes	yes	no	yes	no	no	no	yes	no	yes	no	no	yes
63	male	62	12	yes	2	right	multiple	yes	yes	yes	yes	no	no	yes	no	no	yes	no	no	yes
64	male	59	14	yes	2	left	lower	yes	no	yes	no	no	no	no	no	no	yes	no	no	yes
65	male	61	11	yes	2	right	lower	yes	yes	yes	yes	no	no	yes	yes	no	no	no	no	yes
66	female	56	15	yes	2	left	lower	yes	yes	no	no	no	no	yes	no	no	no	no	no	yes
67	female	57	13	yes	2	right	lower	yes	yes	yes	yes	no	no	yes	no	no	no	no	no	yes
68	female	59	11	yes	2	right	upper	yes	no	yes	yes	yes	no	yes	no	no	no	no	no	yes
69	female	60	13	yes	2	left	lower	yes	yes	yes	no	no	no	no	yes	no	no	no	no	yes
70	female	60	12	yes	2	right	lower	yes	yes	yes	no	no	no	yes	no	no	no	no	no	yes
71	female	62	12	yes	2	left	lower	yes	yes	yes	yes	no	no	yes	yes	no	no	no	no	yes
72	female	63	11	yes	2	right	lower	yes	yes	no	no	no	no	yes	no	no	no	no	no	yes
73	female	64	14	yes	2	left	multiple	yes	yes	yes	no	no	no	yes	no	no	no	no	no	yes
74	female	76	25	yes	2	right	lower	yes	yes	yes	no	no	no	no	yes	no	no	no	no	yes
75	female	75	22	no	2	left	upper	yes	no	no	no	no	no	yes	yes	no	yes	no	no	yes
76	female	77	24	no	2	right	lower	yes	yes	yes	yes	no	no	yes	no	no	yes	no	no	yes
77	female	76	26	no	2	right	lower	yes	yes	yes	no	no	no	yes	yes	no	yes	no	no	yes
78	female	76	24	no	2	left	lower	yes	no	no	no	no	no	no	no	no	yes	no	no	yes
79	female	77	23	no	2	right	lower	yes	yes	yes	no	no	no	yes	no	no	yes	no	no	yes
80	female	75	26	no	2	left	lower	yes	no	yes	no	no	no	no	no	no	yes	no	no	yes
81	female	77	23	no	2	left	lower	yes	yes	yes	yes	no	no	yes	yes	no	yes	no	no	yes
82	female	78	24	no	2	right	lower	yes	yes	yes	no	no	no	yes	no	no	yes	no	no	yes
83	female	78	22	no	2	left	upper	yes	yes	yes	no	no	no	no	yes	no	yes	no	no	yes
84	male	68	13	yes	3	right	lower	yes	no	yes	yes	no	no	yes	no	no	yes	no	no	yes
85	female	56	24	yes	3	right	multiple	yes	yes	yes	no	no	no	yes	no	no	yes	no	no	yes
86	female	78	24	yes	3	left	lower	yes	yes	yes	no	no	no	yes	no	no	yes	no	no	yes
87	female	76	26	no	3	right	lower	yes	yes	yes	no	no	no	no	yes	no	yes	no	no	yes
88	male	78	13	yes	4	left	lower	yes	no	yes	no	no	no	no	no	no	yes	no	no	yes
89	female	76	13	yes	4	right	lower	yes	yes	yes	no	no	no	yes	yes	no	yes	no	no	yes
90	female	76	25	yes	4	left	lower	yes	yes	yes	yes	no	no	yes	no	no	yes	no	no	yes

## Sheet: Sheet2
			left
